# Supplementary material for: Psychometric assessment of the Chinese version of the perceptions of palliative care instrument in advanced cancer patients: a cross-sectional study
Source: PeerJ journal article supplement (doi:10.7717/peerj.20622), 2026-01-15
Supplement: Questionnaire_English_Version.pdf [file Questionnaire_English_Version.pdf]

# General Information Questionnaire

- 1.surname and personal name : \_\_\_\_\_ 2. Tel:\_\_\_\_\_
- 3.age : \_\_\_\_\_ 4. Gender: ① Male ② Female
- 5.Height: \_\_cm Weight:\_\_\_\_\_ kg
- 6.Ethnic groups: ① Han ② Ethnic minorities\_\_\_\_\_
- 7.Religion: ① None ② Yes\_\_\_\_\_
- 8.Frequency of participation in religious activities: ① once or twice a week ② three or four times a week
- 9.Marital status: ① unmarried ② married ③ widowed ④ divorced ⑤ other
- 10.Educational background: ① illiterate ② primary school ③ junior high school ④ senior high school and college education ⑤ bachelor's degree or above
- 11.Your past/ present occupation is: ① farmer ② teacher ③ worker ④ doctor ⑤ civil servant ⑥ freelancer ⑦ other
12. Your living style: ① live alone ② live with family/ friends ③ assisted institutions or nursing homes ④ others
- 13.Your residence: ① Town ② Countryside
- 14.Your monthly income is approximately: ① <1000 ② 1000~ ③ 2000~ ④ 3000~ ⑤ 4000~ ⑥ ≥5000
- 15.Do you have financial pressure: ① No ② Yes
- 16.Your medical expenses: ① Cooperative medical care ② Self-paid ③ Public medical care ④ Commercial medical insurance ⑤ Others
- 17.Cancer types: ① lung cancer ② liver cancer ③ stomach cancer ④ colorectal cancer ⑤ breast cancer ⑥ others\_\_\_\_\_
- 18.Have you had surgery: ① No ② Yes
- 19.Time from diagnosis to this survey:\_\_\_\_\_
- 20.Number of hospitalizations: ① 1-3 ② 4-6 ③ 7 or more
- 21.Have you had any adverse reactions during chemotherapy?  
① No ② nausea/vomiting ③ anemia/bleeding ④ numbness of hands and feet ⑤ hair loss ⑥ others\_\_\_\_\_
- 22.Have you participated in a clinical drug trial during your treatment: ① No ② Yes
- 23.Disease stage: ① I stage ② II stage ③ III stage ④ IV stage
- 24.Do you have any other diseases besides cancer: ① No ② Yes:\_\_\_\_\_
25. Knowledge of the condition: ① Do not know ② a little ③ basic ④ fully
- 26.Do you understand hospice care: ① Never understood ② only know a little ③ understand and can explain
27. How you get information about hospice care: ① Magazines/books ② Mobile Internet ③ Other social media

## Anxiety Care Perception and Need Scale

Note: Please draw on the number corresponding to the view you agree with most at the end of each entry✓ There is no right or wrong answer, and we are very interested in your current views.

When I hear about hospice care, how much do I agree with the following statement?

|                            | I couldn't agree more | disagree | Slightly disagree | I don't agree with it<br>I don't object to that either | a little agree | agree | extraordinary agree |
|----------------------------|-----------------------|----------|-------------------|--------------------------------------------------------|----------------|-------|---------------------|
| 1. I was scared            |                       |          |                   |                                                        |                |       |                     |
| 2. I feel hopeful          |                       |          |                   |                                                        |                |       |                     |
| 3. I felt pressured        |                       |          |                   |                                                        |                |       |                     |
| 4. I felt safe             |                       |          |                   |                                                        |                |       |                     |
| 5. I'm frustrated          |                       |          |                   |                                                        |                |       |                     |
| 6. I feel anxious          |                       |          |                   |                                                        |                |       |                     |
| 7. I feel very comfortable |                       |          |                   |                                                        |                |       |                     |

If the doctor now suggests that I be referred to hospice care, I will...

|                                                 | I couldn't agree more | disagree | Slightly disagree | I don't agree with it<br>I don't object to that either | a little agree | agree | extraordinary agree |
|-------------------------------------------------|-----------------------|----------|-------------------|--------------------------------------------------------|----------------|-------|---------------------|
| 8. I think the more support you get, the better |                       |          |                   |                                                        |                |       |                     |
| 9. I feel my illness is out of control          |                       |          |                   |                                                        |                |       |                     |
| 10. I felt the doctor really cared about me     |                       |          |                   |                                                        |                |       |                     |
| 11. I don't think there's anything else to try  |                       |          |                   |                                                        |                |       |                     |
| 12. I felt I had reached the                    |                       |          |                   |                                                        |                |       |                     |

|                                                                                                   |  |  |  |  |  |  |  |
|---------------------------------------------------------------------------------------------------|--|--|--|--|--|--|--|
| end of my life                                                                                    |  |  |  |  |  |  |  |
| 13. I felt like my doctor had given up on me                                                      |  |  |  |  |  |  |  |
| 14. I think my illness is terminal                                                                |  |  |  |  |  |  |  |
| 15. I feel like I'm going to lose touch with the doctors and nurses who are currently treating me |  |  |  |  |  |  |  |
| 16. I will look more positively at the future                                                     |  |  |  |  |  |  |  |
| 17. I feel like I'm in more control of my game                                                    |  |  |  |  |  |  |  |
| 18. I felt that there might be "someone from the unfamiliar hospice team" coming to my house      |  |  |  |  |  |  |  |
| 19. I would worry they'd disrupt my daily life                                                    |  |  |  |  |  |  |  |
| 20. I would have feared they were going to talk to me about death                                 |  |  |  |  |  |  |  |

| 21. Now let's learn about hospice care. Are you ready? |   |   |   |   |   |   |   |   |   |                   |
|--------------------------------------------------------|---|---|---|---|---|---|---|---|---|-------------------|
| 0                                                      | 1 | 2 | 3 | 4 | 5 | 6 | 7 | 8 | 9 | 10                |
| Totally unprepared                                     |   |   |   |   |   |   |   |   |   | Be fully prepared |

The following needs fall within the scope of hospice care services and can help you, your family and friends. Please assess your current needs and status

|                                                                         | I couldn't agree more | disagree | Slightly disagree | I don't agree with it either<br>I don't object to that either | Slightly agree | agree | extraordinary agree |
|-------------------------------------------------------------------------|-----------------------|----------|-------------------|---------------------------------------------------------------|----------------|-------|---------------------|
| 22. My family or friends need to help me with physical care             |                       |          |                   |                                                               |                |       |                     |
| 23. I need help to control physical symptoms like pain                  |                       |          |                   |                                                               |                |       |                     |
| 24. I need emotional support                                            |                       |          |                   |                                                               |                |       |                     |
| 25. I need help with medication management                              |                       |          |                   |                                                               |                |       |                     |
| 26. I wanted to talk to people about death                              |                       |          |                   |                                                               |                |       |                     |
| 27. My family or friends need emotional support                         |                       |          |                   |                                                               |                |       |                     |
| 28. I need spiritual or emotional support                               |                       |          |                   |                                                               |                |       |                     |
| 29. I hope someone will talk to my family or friends about my condition |                       |          |                   |                                                               |                |       |                     |
| 30. After getting sick, I wanted to be                                  |                       |          |                   |                                                               |                |       |                     |

|                                                                                                   |                       |          |                   |                                                               |                |       |                     |
|---------------------------------------------------------------------------------------------------|-----------------------|----------|-------------------|---------------------------------------------------------------|----------------|-------|---------------------|
| helped to find meaning in my illness                                                              |                       |          |                   |                                                               |                |       |                     |
| 31. I want to be prepared for what might happen in the future                                     |                       |          |                   |                                                               |                |       |                     |
| 32. I need someone to take care of my daily life, like taking a shower                            |                       |          |                   |                                                               |                |       |                     |
| 33. I wanted to talk to someone who could understand what I was going through                     |                       |          |                   |                                                               |                |       |                     |
| 34. I hope my family and friends will be prepared for what happens in the future                  |                       |          |                   |                                                               |                |       |                     |
| How much would I agree with the following statement if I were to think about my current health?   |                       |          |                   |                                                               |                |       |                     |
|                                                                                                   | I couldn't agree more | disagree | Slightly disagree | I don't agree with it either<br>I don't object to that either | a little agree | agree | extraordinary agree |
| 35. I was worried I'd be a burden to others                                                       |                       |          |                   |                                                               |                |       |                     |
| 36. I feel like I'm too dependent on others to take care of me                                    |                       |          |                   |                                                               |                |       |                     |
| 37. I worry that my family and friends don't have time for themselves because they're looking af- |                       |          |                   |                                                               |                |       |                     |

|        |  |  |  |  |  |  |  |
|--------|--|--|--|--|--|--|--|
| ter me |  |  |  |  |  |  |  |
|--------|--|--|--|--|--|--|--|

## Edmonton Symptom Evaluation System (ESAS)

Please circle the number that best describes your health status in the last 24 hours

### Psychological Pain Thermometer (DT)

first , Please rate the numbers on a scale that best matches your average level of distress over the past week✓ ”

|                                         |   |   |   |   |   |   |   |   |   |   |    |                                       |
|-----------------------------------------|---|---|---|---|---|---|---|---|---|---|----|---------------------------------------|
| No pain                                 | 0 | 1 | 2 | 3 | 4 | 5 | 6 | 7 | 8 | 9 | 10 | It was excruciating                   |
| Never tired                             | 0 | 1 | 2 | 3 | 4 | 5 | 6 | 7 | 8 | 9 | 10 | Extremely tired                       |
| No nausea                               | 0 | 1 | 2 | 3 | 4 | 5 | 6 | 7 | 8 | 9 | 10 | It was extremely nauseating           |
| No depression                           | 0 | 1 | 2 | 3 | 4 | 5 | 6 | 7 | 8 | 9 | 10 | Extremely depressed                   |
| Don't be anxious                        | 0 | 1 | 2 | 3 | 4 | 5 | 6 | 7 | 8 | 9 | 10 | HA                                    |
| Don't be sleepy                         | 0 | 1 | 2 | 3 | 4 | 5 | 6 | 7 | 8 | 9 | 10 | Extremely sleepy                      |
| The appetite was excellent              | 0 | 1 | 2 | 3 | 4 | 5 | 6 | 7 | 8 | 9 | 10 | Poor appetite                         |
| I feel the quality of life is excellent | 0 | 1 | 2 | 3 | 4 | 5 | 6 | 7 | 8 | 9 | 10 | I feel my quality of life is terrible |
| No itching                              | 0 | 1 | 2 | 3 | 4 | 5 | 6 | 7 | 8 | 9 | 10 | Extreme itching                       |
| No gas pressure                         | 0 | 1 | 2 | 3 | 4 | 5 | 6 | 7 | 8 | 9 | 10 | Extreme shortness of breath           |
| Other issues                            | 0 | 1 | 2 | 3 | 4 | 5 | 6 | 7 | 8 | 9 | 10 |                                       |

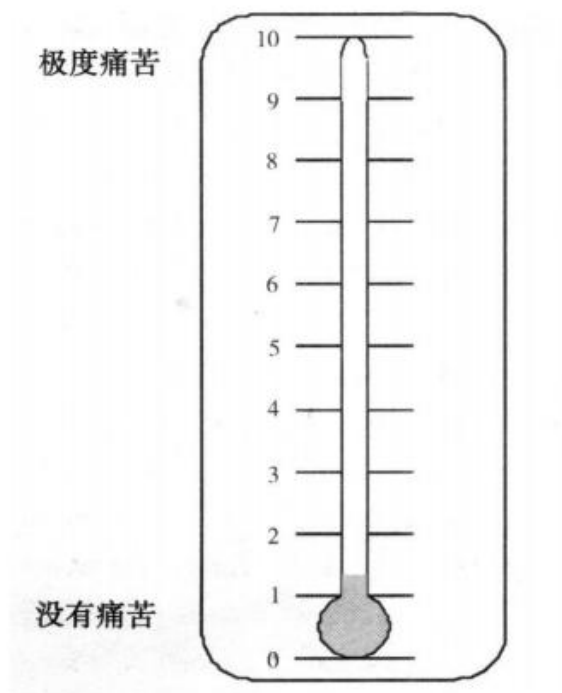

Next, indicate which of the following causes your distress? Check the item that applies✓”。



|                          |                                                     |
|--------------------------|-----------------------------------------------------|
|                          | <b>physical problem</b>                             |
| <input type="checkbox"/> | No time and energy to take care of children/elderly |
| <input type="checkbox"/> | No time or energy for housework                     |
| <input type="checkbox"/> | economic issue                                      |
| <input type="checkbox"/> | transportation                                      |
| <input type="checkbox"/> | Work/study                                          |
| <input type="checkbox"/> | surrounding environment                             |
|                          | <b>Communication problems</b>                       |
| <input type="checkbox"/> | Get along with children/old people                  |
| <input type="checkbox"/> | Get along with your partner                         |
| <input type="checkbox"/> | Get along with your friends                         |
| <input type="checkbox"/> | Get along with the medical staff                    |
|                          | <b>Emotional problem</b>                            |
| <input type="checkbox"/> | depressed                                           |
| <input type="checkbox"/> | fear                                                |
| <input type="checkbox"/> | lonely                                              |
| <input type="checkbox"/> | nervous                                             |
| <input type="checkbox"/> | sad                                                 |
| <input type="checkbox"/> | worry                                               |
| <input type="checkbox"/> | Loss of interest in daily activities                |
| <input type="checkbox"/> | sleep                                               |
| <input type="checkbox"/> | Memory loss / difficulty concentrating              |

|                          |                              |
|--------------------------|------------------------------|
|                          | <b>physical problem</b>      |
| <input type="checkbox"/> | Appearance/body              |
| <input type="checkbox"/> | Bath / Dressing              |
| <input type="checkbox"/> | breathe                      |
| <input type="checkbox"/> | Changes in urination         |
| <input type="checkbox"/> | astriktion                   |
| <input type="checkbox"/> | diarrhoea                    |
| <input type="checkbox"/> | take food                    |
| <input type="checkbox"/> | weary                        |
| <input type="checkbox"/> | hydroncus                    |
| <input type="checkbox"/> | have a fever                 |
| <input type="checkbox"/> | dizzy                        |
| <input type="checkbox"/> | indigestion                  |
| <input type="checkbox"/> | Oral pain                    |
| <input type="checkbox"/> | feel like vomiting           |
| <input type="checkbox"/> | Nose dry / congested         |
| <input type="checkbox"/> | pain                         |
| <input type="checkbox"/> | nature                       |
| <input type="checkbox"/> | xerosis cutis                |
| <input type="checkbox"/> | Numbness in hands and feet   |
| <input type="checkbox"/> | Physical activity is limited |
|                          | <b>Faith/religion</b>        |
| <input type="checkbox"/> | Faith/religion               |
