# Supplementary material for: Psychometric assessment of the Chinese version of the perceptions of palliative care instrument in advanced cancer patients: a cross-sectional study
Source: PeerJ journal article supplement (doi:10.7717/peerj.20622), 2026-01-15
Supplement: Questionnaire_Original_Version.pdf [file Questionnaire_Original_Version.pdf]

## 一般资料问卷

- 1.姓名: \_\_\_\_\_ 2.电话: \_\_\_\_\_
- 3.年龄: \_\_\_\_\_ 4.性别: ① 男 ② 女
- 5.身高: \_\_\_\_\_ cm 体重: \_\_\_\_\_ kg
- 6.民族: ①汉族 ②少数民族 \_\_\_\_\_
- 7.宗教信仰: ①无 ②有 \_\_\_\_\_
- 8.参加宗教活动的次数: ①每周一至两次 ②每周三到四次
- 9.婚姻状况: ①未婚 ②已婚 ③丧偶 ④离异 ⑤其他
- 10.文化程度: ①不识字 ②小学 ③初中 ④高中及大专 ⑤本科及以上学历
- 11.您曾经/现在的职业是: ①农民 ②教师 ③工人 ④医生 ⑤公务员 ⑥自由职业 ⑦其他
- 12.您的居住方式: ① 独居 ②与家人/朋友一起生活 ③辅助机构或疗养机构 ④其他
- 13.您的居住地: ①城镇 ②农村
- 14.您的月收入大约: ①<1000 ②1000~ ③2000~ ④3000~ ⑤4000~ ⑥≥5000
- 15.您是否有经济压力: ①无 ②有
- 16.您的医疗费用情况: ①合作医疗 ②自费 ③公费医疗 ④商业医疗保险 ⑤其他
- 17.癌症类型: ①肺癌 ②肝癌 ③胃癌 ④结直肠癌 ⑤乳腺癌 ⑥其他 \_\_\_\_\_
- 18.您是否接受过手术治疗: ①否 ②是
- 19.您从确诊疾病到本次调查的时间: \_\_\_\_\_
- 20.您住院化疗次数: ①1~3 次 ②4~6 次 ③7 次以上
- 21.您在化疗期间是否出现过不良反应:  
①无 ②恶心/呕吐 ③贫血/出血 ④手脚麻木 ⑤脱发 ⑥其他 \_\_\_\_\_
- 22.您在治疗期间是否接受过临床药物试验: ①否 ②是
- 23.疾病分期: ①I期 ②II期 ③III期 ④IV期
- 24.您是否有除癌症之外的其他疾病: ①否 ②是: \_\_\_\_\_
- 25.病情知晓情况: ①不了解 ②有一点了解 ③基本了解 ④完全了解
- 26.您是否了解安宁疗护: ①从未了解过 ②只了解一点点 ③了解并能够解释
- 27.您了解安宁疗护信息的渠道: ①杂志/书籍 ②手机网络 ③其他社交媒体

## 安宁疗护感知与需求量表

说明：请在每个条目后您当下最认同的观点对应的数字上画✓。回答没有对错之分，我们对您当下的看法很感兴趣。

| 当我听到安宁疗护时，当下会对以下说法有多大程度上的认同？ |       |     |       |          |      |    |      |
|------------------------------|-------|-----|-------|----------|------|----|------|
|                              | 非常不同意 | 不同意 | 稍微不同意 | 既不同意也不反对 | 稍微同意 | 同意 | 非常同意 |
| 1.我感到害怕                      |       |     |       |          |      |    |      |
| 2.我感到有希望                     |       |     |       |          |      |    |      |
| 3.我感到有压力                     |       |     |       |          |      |    |      |
| 4.我感到有安全感                    |       |     |       |          |      |    |      |
| 5.我感到沮丧                      |       |     |       |          |      |    |      |
| 6.我感到焦虑                      |       |     |       |          |      |    |      |
| 7.我感到很舒心                     |       |     |       |          |      |    |      |
| 如果现在医生建议我转诊安宁疗护的话，我会.....    |       |     |       |          |      |    |      |
|                              | 非常不同意 | 不同意 | 稍微不同意 | 既不同意也不反对 | 稍微同意 | 同意 | 非常同意 |
| 8.我觉得获得的支持越多感觉越好             |       |     |       |          |      |    |      |
| 9.我觉得我的疾病已无法控制               |       |     |       |          |      |    |      |
| 10.我觉得医生真的很关心我               |       |     |       |          |      |    |      |
| 11.我觉得没有其他可尝试的了              |       |     |       |          |      |    |      |
| 12.我觉得我已经走到了生命的尽头            |       |     |       |          |      |    |      |
| 13.我觉得我的医生已经放弃我了             |       |     |       |          |      |    |      |
| 14.我觉得我的病已经是绝症了              |       |     |       |          |      |    |      |
| 15.我觉得我将与当前治疗我的医生、护士失去联系     |       |     |       |          |      |    |      |
| 16.我会更积极的看待未来                |       |     |       |          |      |    |      |
| 17.我觉得能更好得掌控自己的状态            |       |     |       |          |      |    |      |
| 18.我觉得可能将有“陌生的安宁疗护团队的人”来到我家  |       |     |       |          |      |    |      |
| 19.我会担心他们会扰乱我的日常生活           |       |     |       |          |      |    |      |
| 20.我会担心他们要和我谈论死亡             |       |     |       |          |      |    |      |

|                        |   |   |   |   |   |   |   |   |   |       |
|------------------------|---|---|---|---|---|---|---|---|---|-------|
| 21. 现在来了解下安宁疗护，您准备好了吗？ |   |   |   |   |   |   |   |   |   |       |
| 0                      | 1 | 2 | 3 | 4 | 5 | 6 | 7 | 8 | 9 | 10    |
| 完全没有准备好                |   |   |   |   |   |   |   |   |   | 完全准备好 |

以下需求属于安宁疗护服务范畴，是可以帮助到您、您的家人及朋友，请评估自己当下的需求和状态

|                             | 非常不同意 | 不同意 | 稍微不同意 | 既不同意也不反对 | 稍微同意 | 同意 | 非常同意 |
|-----------------------------|-------|-----|-------|----------|------|----|------|
| 22.我的家人或朋友需要帮我进行身体照护        |       |     |       |          |      |    |      |
| 23.我需要帮助来控制身体症状，比如疼痛        |       |     |       |          |      |    |      |
| 24.我需要情感支持                  |       |     |       |          |      |    |      |
| 25.我需要在用药管理方面得到帮助           |       |     |       |          |      |    |      |
| 26.我想跟人谈谈死亡的事               |       |     |       |          |      |    |      |
| 27.我的家人或朋友需要情感支持            |       |     |       |          |      |    |      |
| 28.我需要精神或灵性支持               |       |     |       |          |      |    |      |
| 29.我希望有人跟我的家人或朋友谈谈我的病情      |       |     |       |          |      |    |      |
| 30.患了疾病后，我想要别人帮助以探寻疾病经历的意义  |       |     |       |          |      |    |      |
| 31.我想为将来可能发生的事情做准备          |       |     |       |          |      |    |      |
| 32.我需要别人照料我的日常生活，比如洗澡       |       |     |       |          |      |    |      |
| 33.我想和一个能理解我正在经历什么的人聊聊      |       |     |       |          |      |    |      |
| 34.我希望我的家人和朋友能够为将来发生的事情有所准备 |       |     |       |          |      |    |      |

当我想到目前的健康状况时，现在会对以下说法有多大程度上的认同？

|                              | 非常不同意 | 不同意 | 稍微不同意 | 既不同意也不反对 | 稍微同意 | 同意 | 非常同意 |
|------------------------------|-------|-----|-------|----------|------|----|------|
| 35.我担心我是别人的负担                |       |     |       |          |      |    |      |
| 36.我觉得我太依赖别人照顾我了             |       |     |       |          |      |    |      |
| 37.我担心我的家人和朋友因为照顾我而没有属于自己的时间 |       |     |       |          |      |    |      |

埃德蒙顿症状评价系统（ESAS）

请圈出最能描述在最近 24 小时中您自己的健康状态的数字

心理痛苦温度计（DT）

首先，请在最符合您近一周所经历的平均痛苦水平的数字上“✓”

|          |   |   |   |   |   |   |   |   |   |   |    |          |
|----------|---|---|---|---|---|---|---|---|---|---|----|----------|
| 无疼痛      | 0 | 1 | 2 | 3 | 4 | 5 | 6 | 7 | 8 | 9 | 10 | 极度疼痛     |
| 不疲倦      | 0 | 1 | 2 | 3 | 4 | 5 | 6 | 7 | 8 | 9 | 10 | 极度疲倦     |
| 不恶心      | 0 | 1 | 2 | 3 | 4 | 5 | 6 | 7 | 8 | 9 | 10 | 极度恶心     |
| 不抑郁      | 0 | 1 | 2 | 3 | 4 | 5 | 6 | 7 | 8 | 9 | 10 | 极度抑郁     |
| 不焦虑      | 0 | 1 | 2 | 3 | 4 | 5 | 6 | 7 | 8 | 9 | 10 | 极度焦虑     |
| 不瞌睡      | 0 | 1 | 2 | 3 | 4 | 5 | 6 | 7 | 8 | 9 | 10 | 极度瞌睡     |
| 食欲极好     | 0 | 1 | 2 | 3 | 4 | 5 | 6 | 7 | 8 | 9 | 10 | 食欲极差     |
| 感觉生活质量极佳 | 0 | 1 | 2 | 3 | 4 | 5 | 6 | 7 | 8 | 9 | 10 | 感觉生活质量极差 |
| 不瘙痒      | 0 | 1 | 2 | 3 | 4 | 5 | 6 | 7 | 8 | 9 | 10 | 极度瘙痒     |
| 无气急      | 0 | 1 | 2 | 3 | 4 | 5 | 6 | 7 | 8 | 9 | 10 | 极度气急     |
| 其他问题     | 0 | 1 | 2 | 3 | 4 | 5 | 6 | 7 | 8 | 9 | 10 |          |

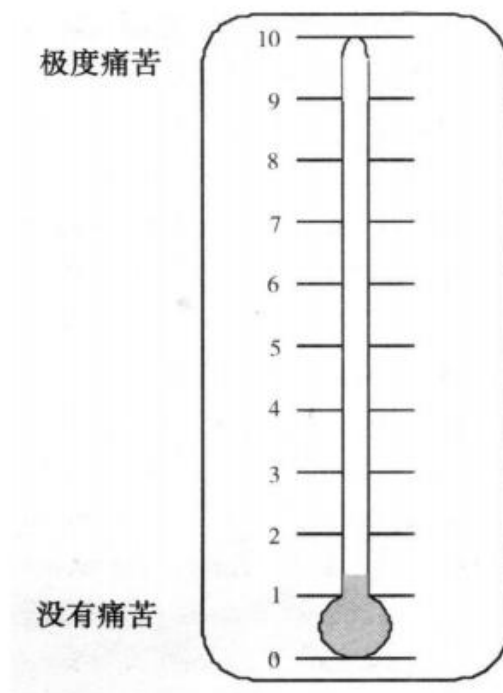

接着，请指出下列哪些选项是引起您痛苦的原因？并在该项目前打“✓”。

|                          |               |
|--------------------------|---------------|
|                          | <b>实际问题</b>   |
| <input type="checkbox"/> | 无时间精力照顾孩子/老人  |
| <input type="checkbox"/> | 无时间精力做家务      |
| <input type="checkbox"/> | 经济问题          |
| <input type="checkbox"/> | 交通出行          |
| <input type="checkbox"/> | 工作/上学         |
| <input type="checkbox"/> | 周围环境          |
|                          | <b>交往问题</b>   |
| <input type="checkbox"/> | 与孩子/老人相处      |
| <input type="checkbox"/> | 与伴侣相处         |
| <input type="checkbox"/> | 与亲友相处         |
| <input type="checkbox"/> | 与医护人员相处       |
|                          | <b>情绪问题</b>   |
| <input type="checkbox"/> | 抑郁            |
| <input type="checkbox"/> | 恐惧            |
| <input type="checkbox"/> | 孤独            |
| <input type="checkbox"/> | 紧张            |
| <input type="checkbox"/> | 悲伤            |
| <input type="checkbox"/> | 担忧            |
| <input type="checkbox"/> | 对日常活动丧失兴趣     |
| <input type="checkbox"/> | 睡眠            |
| <input type="checkbox"/> | 记忆力下降 /注意力不集中 |

|                          |                |
|--------------------------|----------------|
|                          | <b>身体问题</b>    |
| <input type="checkbox"/> | 外表/形体          |
| <input type="checkbox"/> | 洗澡 /穿衣         |
| <input type="checkbox"/> | 呼吸             |
| <input type="checkbox"/> | 排尿改变           |
| <input type="checkbox"/> | 便秘             |
| <input type="checkbox"/> | 腹泻             |
| <input type="checkbox"/> | 进食             |
| <input type="checkbox"/> | 疲乏             |
| <input type="checkbox"/> | 水肿             |
| <input type="checkbox"/> | 发烧             |
| <input type="checkbox"/> | 头晕             |
| <input type="checkbox"/> | 消化不良           |
| <input type="checkbox"/> | 口腔疼痛           |
| <input type="checkbox"/> | 恶心             |
| <input type="checkbox"/> | 鼻子干燥/充血        |
| <input type="checkbox"/> | 疼痛             |
| <input type="checkbox"/> | 性              |
| <input type="checkbox"/> | 皮肤干燥           |
| <input type="checkbox"/> | 手/脚麻木          |
| <input type="checkbox"/> | 身体活动受限制        |
|                          | <b>信仰/宗教问题</b> |
| <input type="checkbox"/> | 信仰/宗教问题        |
